# Supplementary material
Source: Springer Nature journal article supplement (https://www.springermedizin.de/resource/supplementary/12913_2012_2272_MOESM3_ESM.pdf/9530362)

INNER REGIONAL    REMOTE  
MAJOR CITIES    OUTER REGIONAL

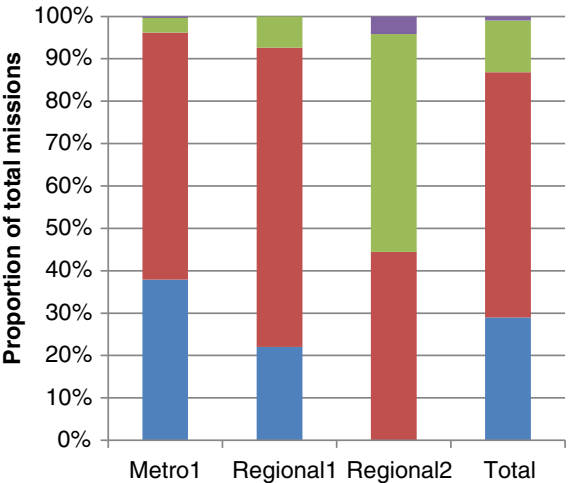

Supplement: MOESM3 [file 9530362]
